# Supplementary material for: Novel chiral imidazole cyclophane receptors: synthesis and enantioselective recognition for amino acid derivatives
Source: Royal Society of Chemistry journal article supplement (doi:10.1039/b103325p), 2001-01-01
Supplement: b103325p.doc [file b103325p.doc]

# Supporting Information

*A typical procedure for the preparation of* chiral imidazole cyclophanes**:** A 250 mL four necked round-bottom flask was equipped with two 50 mL addition funnels and a nitrogen inlet. The flask was then charged with 100 mL of dry DMF. In a separate flask, compound **2** (0.5 g, 1.07 mmol) was dissolved in 50 mL of dry DMF and sodium hydride (2.35 mmol) was added under a nitrogen atmosphere at -5-0 °C. The resulting mixture was stirred for 1 h, then cannulated into one of the addition funnels. The other addition funnel was charged with a dibromide (1.07 mmol) in 50 mL of DMF. The two solutions were simultaneously added dropwise over a period of 20 h with stirring at -5-0 °C. When the reaction was complete as monitored by TLC (silica gel, CHCl3: CH3OH=10: 1), the solvent was evaporated in vacuo. CHCl3 (100 mL) and H2O (20 mL) were then added. The organic layer was separated, and dried over MgSO4. The filterate was evaporated under reduced pressure, and the residue was purified by column chromatography on silica gel (CHCl3: CH3OH=10: 1) to give the title compound **3**-**6**as a white solid.

Cyclophane **3**: yield 60.1%; m.p. 261-263 °C; [a] +70.0 (c = 0.5, CHCl3). 1H NMR (400 MHz, CDCl3): d 3.15 (dd, J= 4.0, 4.4 Hz, 2H, 2*CH2a*CHNH), 3.24 (dd, J = 4.0, 4.4 Hz, 2H, 2*CH2b*CHNH), 3.56 (s, 6H, 2OCH3), 4.94 (d, J = 15.2 Hz, 2H, 2Py*CH2a*N), 5.04 (d, J = 15.2 Hz, 2H, 2Py*CH2b*N), 5.14 (m, 2H, 2CH2*CH*NH), 6.74 (s, 2H, 2Im5H), 7.21 (m, 3H, CH2*Py*CH2), 7.38 (s, 2H, 2Im2H), 7.94 (m, 3H, COPyCO), 9.50 (d, J = 9.2 Hz, 2H, 2CONH) ppm. MS (m/z): 573 (M+, 15). Anal. Calcd. for C28H28N8O6: C 58.73, H 4.93, N 19.57; found C 58.66, H 5.05, N 19.45.

Cyclophane **4**: yield 50.0%; m.p. 250-251 °C; [] +355.6 (c = 0.6, CHCl3). 1H NMR (400 MHz, CDCl3):  3.03 (dd, J = 4.0, 4.4 Hz, 2H, 2*CH2a*CHNH), 3.18 (dd, J = 4.0, 4.4 Hz, 2H, 2*CH2b*CHNH), 3.47 (s, 6H, 2OCH3), 4.90 (d, J = 15.6 Hz, 2H, 2Py*CH2a*N), 5.13 (d, J = 15.6 Hz, 2H, 2Py*CH2b*N), 5.32 (m, 2H, 2CH2*CH*NH), 6.50 (s, 2H, 2Im5H), 7.20-7.36 (m, 4H, Ph), 7.72 (s, 2H, 2Im2H), 8.00 (t, J = 8.0 Hz, 1H, PyH4), 8.36 (d, J=7.6 Hz, 2H, PyH3 and PyH5), 9.09 (d, J=9.2 Hz, 2H, 2CONH) ppm. MS (m/z): 572 (M+, 10). Anal. Calcd. for C29H29N7O6: C 60.93, H 5.11, N 17.16; found C 60.79, H 5.10, N 16.80.

Cyclophane **5**: yield 20.9%; m.p. 257-259 °C; [] +34.8 (c = 0.6, CHCl3). 1H NMR (400 MHz, CDCl3):  3.12 (dd, J = 4.0, 4.4 Hz, 2H, 2*CH2a*CHNH), 3.44(dd, J = 4.0, 4.4 Hz, 2H, 2*CH2b*CHNH), 3.75 (s, 6H, 2OCH3), 4.75 (d, J = 15.2 Hz, 2H, 2Py*CH2a*N), 4.90 (d, 2H, J=15.2 Hz, 2Py*CH2b*N), 4.98 (m, 2H, 2CH2*CH*NH), 6.65 (s, 2H, 2Im5H), 6.81 (m, 4H, Ph), 7.41(s, 2H, 2Im2H), 8.00 (t, J = 8.0 Hz, 1H, PyH4), 8.16 (d, J = 7.8 Hz, 2H, PyH3 and PyH5), 8.36 (d, J = 9.2 Hz, 2H, 2CONH) ppm. MS (m/z): 572 (M+, 10). Anal. Calcd. for C29H29N7O6: C 60.93, H 5.11, N 17.16; found C 60.77, H 5.05, N 17.10. Cyclophane **6**: yield 80.5%; m.p. 156-159 °C; [] +6.1 (c = 0.5, CHCl3). 1H NMR (400 MHz, CDCl3):  1.45 (m, 4H, CH2*(CH2)2*CH2), 3.06 (dd, J = 4.0, 4.4 Hz, 2H, 2*CH2a*CHNH), 3.25 (dd, J = 4.0, 4.4 Hz, 2H, 2*CH2b*CHNH), 3.70 (s, 6H, 2OCH3), 3.86 (m, 4H, *CH2*(CH2)2*CH2*), 5.25 (m, 2H, 2CH2*CH*NH), 6.63 (s, 2H, 2Im5H), 7.11 (s, 2H, 2Im2H), 7.98 (t, J = 8.0 Hz, 1H, PyH4), 8.33 (d, J = 8.0 Hz, 2H, PyH3 and PyH5), 9.52 (d, J = 8.4 Hz, 2H, 2CONH) ppm. MS (m/z ): 524 (M+, 10). Anal. Calcd. for C25H29 N7O6: C 57.35, H 5.58, N 18.73; found C 57.12, H 5.33, N 18.41.
